# Supplementary material for: Quantifying SO 2 oxidation pathways to atmospheric sulfate by using stable sulfur and oxygen isotopes: laboratory simulation and field observation
Source: Copernicus journal article supplement (doi:10.5194/egusphere-2023-2554), 2023-11-20
Supplement: Supplementary file [file egusphere-2023-2554-RC1-supplement.pdf]

#### General Comments:

In recent years, air pollution is seriously threatening the health of millions of people in China. Sulfate is one of the major chemical species in  $PM_{2.5}$ , and play a critical role in human health, and environmental chemistry. However, its formation in the atmosphere remains controversial. In this study, both observational data ( $\delta^{34}S$  and  $\delta^{18}O$  values) and laboratory simulation are used to constrain  $SO_2$  oxidation pathways. The authors found that the sulfate in  $PM_{2.5}$  was mainly formed from the oxidation of  $SO_2$  by OH,  $H_2O_2$  and TMI. This work provides a valuable dataset of  $\delta^{34}S$  and  $\delta^{18}O$  that add critical constraints for sulfate formation pathways.

#### Specific Comments:

1. Page 4, Lines 83-84 The authors mention that the sulfur isotopic fractionation factor of  $SO_2$  oxidation by OH determined with laboratory experiments by Harris et al. (2012) was 1.0087. However, they discussed that “It is reported that sulfur isotope fractionation about  $SO_2$  was -9‰ for homogeneous oxidation process (Tanaka et al., 1994)”. The sulfur isotopic fractionation factor for homogeneous pathway ( $SO_2+OH$ ) obtained by Tanaka et al. (1994) is different from the laboratory results by Harris et al. (2012). The authors need to compare these two values and explain which to be used for their discussion.
2. Page 17, lines 345-348 Their calculations displayed that the  $H_2O_2$  pathway is predominated during heterogeneous oxidation of  $SO_2$ . Could the authors discuss the sources of  $H_2O_2$  in atmosphere if it plays an important role in heterogeneous oxidation of  $SO_2$ ?
3. The conclusion seems to be a bit dry. I suggest that the important implications for this work should be added, besides summarize the main points.

#### Technical corrections:

Page 8, Line 163 Please change “The concentrations of  $PM_{2.5}$ ,  $SO_4^{2-}$  and  $SO_2$ ” to “Variations in concentrations of  $PM_{2.5}$ ,  $SO_4^{2-}$  and  $SO_2$ ”.

Page 9, Line 197 Please change “Sulfur isotope compositions in sulfate and  $SO_2$ ” to “Variations in sulfur isotope compositions in sulfate and  $SO_2$ ”. In addition, the black solid circles represent the  $\delta^{34}S$  values of sulfate instead of  $PM_{2.5}$ .
